# Supplementary material for: Impact of COVID-19 outbreak on the mental health status of undergraduate medical students in a COVID-19 treating medical college: a prospective longitudinal study
Source: PeerJ. 2020 Oct 16;8:e10164. doi: 10.7717/peerj.10164 (PMC7571415; doi:10.7717/peerj.10164)
Supplement: Supplemental Information 5 — The data was collected in two phases. Baseline data was collected during December 2019 and follow-up data was collected during June 2020. The baseline and follow-up data was used for statistical analysis. [file peerj-08-10164-s005.xlsx]

## Sheet: Sheet1
gender	age	residence	year	relative tested positive	interaction with patients	family monthly income	tested for covid	PSQI	pre depression	post depression	pre anxiety	post anxiety	pre stress	post stress	contract worry	survive worry	concern for family	im infected worry	interpersonal relationship	COVID-GA	theoretical knowledge	practical/clinical	affect grades	affect future	COVID-AA
Female	18	Rural	1	No	No	Above 1,00,000	No	7	2	4	6	0	4	8	3	3	5	3	5	19	3	4	3	3	13
Male	21	Rural	3	No	Yes	Above 1,00,000	Yes	0	0	0	0	0	0	6	3	3	3	3	3	15	4	5	5	4	18
Male	21	Rural	3	No	No	Above 1,00,000	No	4	6	10	2	6	16	16	3	2	5	3	5	18	2	5	5	1	13
Female	20	Rural	2	I dont know	I dont know	Above 1,00,000	No	3	0	0	0	0	0	6	4	2	4	4	4	18	2	2	2	5	11
Male	18	Urban	2	No	No	Less than 50,000	No	8	26	30	14	12	20	22	3	3	3	3	3	15	4	5	5	5	19
Male	18	Urban	1	No	Yes	Less than 50,000	No	7	16	16	12	8	16	16	4	1	5	4	5	19	4	5	5	4	18
Female	19	Urban	2	I dont know	No	Less than 50,000	No	10	2	4	2	2	8	16	4	4	4	4	4	20	3	3	3	2	11
Female	24	Urban	4	No	No	Less than 50,000	No	4	12	8	6	0	4	8	2	2	5	2	5	16	5	5	5	4	19
Male	20	Urban	3	No	No	Less than 50,000	No	4	0	2	2	4	2	4	2	3	5	2	5	17	2	4	4	3	13
Female	19	Urban	1	No	No	Less than 50,000	No	4	6	10	0	10	0	2	2	3	5	2	5	17	4	4	5	4	17
Female	19	Urban	1	Yes	No	Less than 50,000	No	3	0	0	0	0	0	0	4	4	5	4	5	22	4	4	5	4	17
Female	18	Urban	2	No	No	Less than 50,000	No	3	0	0	0	0	0	0	4	2	5	4	5	20	4	5	3	2	14
Female	19	Urban	2	No	No	Less than 50,000	No	2	0	0	0	0	0	0	5	2	5	5	5	22	5	5	5	5	20
Female	22	Rural	4	No	No	Less than 50,000	Yes	2	14	16	8	20	10	16	5	2	5	5	5	22	3	5	3	3	14
Female	19	Rural	1	No	No	Less than 50,000	No	5	12	8	6	6	6	8	4	3	5	4	5	21	3	4	3	3	13
Male	21	Rural	1	No	No	Less than 50,000	No	6	6	10	0	4	6	8	2	2	4	2	4	14	4	5	5	4	18
Female	23	Rural	4	No	No	Less than 50,000	No	1	0	2	2	0	0	0	4	4	5	4	5	22	3	3	3	3	12
Male	23	Urban	5	No	Yes	Less than 50,000	No	4	6	18	2	6	10	10	2	2	4	2	4	14	2	2	2	2	8
Female	18	Urban	1	No	No	Less than 50,000	No	8	24	24	12	28	20	24	3	3	5	3	5	19	4	5	5	5	19
Female	18	Urban	1	No	No	Less than 50,000	No	7	18	20	2	18	16	16	2	2	5	2	5	16	4	5	5	4	18
Male	19	Urban	1	No	No	Less than 50,000	No	2	4	6	2	8	6	12	4	3	5	4	5	21	3	3	3	2	11
Male	20	Urban	4	Yes	I dont know	Less than 50,000	No	12	14	2	0	2	10	16	2	2	4	2	4	14	5	5	5	4	19
Male	20	Urban	1	No	No	Less than 50,000	No	2	14	0	8	2	10	12	4	3	3	4	3	17	3	4	4	3	14
Male	18	Urban	1	No	No	Less than 50,000	No	5	14	8	8	8	10	10	3	2	5	3	5	18	4	4	5	4	17
Female	20	Urban	1	No	No	Less than 50,000	No	10	6	6	6	6	8	10	2	2	5	2	5	16	4	4	5	4	17
Female	19	Urban	1	No	No	Less than 50,000	No	9	6	18	4	20	4	6	1	2	4	1	4	12	4	5	3	2	14
Male	20	Urban	1	No	No	Less than 50,000	No	6	2	2	0	6	0	2	4	2	4	4	4	18	5	5	5	5	20
Female	21	Urban	2	No	No	Less than 50,000	No	2	0	0	2	2	0	2	3	2	5	3	5	18	3	4	3	3	13
Male	18	Urban	1	I dont know	No	Less than 50,000	No	2	10	0	2	0	0	0	4	3	5	4	5	21	3	4	3	3	13
Male	20	Urban	1	No	No	Less than 50,000	Yes	4	10	0	2	0	0	0	5	2	5	5	5	22	4	5	5	4	18
Male	18	Rural	1	I dont know	No	Less than 50,000	No	13	40	32	24	22	22	26	5	2	5	5	5	22	3	3	3	3	12
Female	20	Rural	3	No	No	Less than 50,000	No	7	14	18	10	14	16	14	3	2	5	3	5	18	2	2	2	2	8
Female	18	Rural	1	No	No	Less than 50,000	No	2	2	2	6	6	4	6	4	2	4	4	4	18	4	5	5	5	19
Male	21	Rural	1	Yes	No	Less than 50,000	No	1	2	2	0	4	0	2	3	3	3	3	3	15	4	5	5	4	18
Male	19	Rural	1	No	No	Less than 50,000	No	5	2	4	2	0	0	2	3	2	4	3	4	16	3	3	3	2	11
Female	19	Rural	1	No	No	Less than 50,000	No	7	0	2	2	0	0	0	4	2	5	4	5	20	5	5	5	4	19
Female	20	Rural	1	No	No	Less than 50,000	No	2	10	0	2	0	0	0	2	2	4	2	4	14	3	4	4	3	14
Female	22	Urban	5	No	Yes	Less than 50,000	No	16	22	26	2	26	24	30	2	2	4	2	4	14	4	4	5	4	17
Female	22	Urban	5	No	Yes	Less than 50,000	No	16	26	26	18	26	22	30	4	2	4	4	4	18	4	4	5	4	17
Male	22	Urban	4	No	No	Less than 50,000	No	5	6	8	8	4	8	10	3	2	4	3	4	16	4	5	3	2	14
Female	21	Urban	3	No	No	Less than 50,000	No	5	0	4	0	2	2	4	4	2	5	4	5	20	5	5	5	5	20
Male	20	Urban	2	No	No	Less than 50,000	No	15	24	32	2	32	26	30	2	1	4	2	4	13	3	4	3	3	13
Female	20	Urban	2	No	No	Less than 50,000	No	4	4	6	2	8	10	10	2	2	4	2	4	14	3	4	3	3	13
Male	19	Urban	2	Yes	No	Less than 50,000	Yes	2	6	8	8	4	8	10	2	1	2	2	2	9	4	5	5	4	18
Male	21	Urban	3	No	No	Less than 50,000	No	3	0	2	4	2	2	6	3	1	4	3	4	15	3	3	3	3	12
Female	19	Urban	1	No	No	Less than 50,000	No	3	10	0	4	4	2	6	5	3	5	5	5	23	2	2	2	2	8
Female	18	Urban	1	No	No	Less than 50,000	No	0	0	0	4	2	2	8	3	3	2	3	2	13	4	5	5	5	19
Male	20	Urban	2	No	No	Less than 50,000	No	2	0	0	0	0	2	2	3	2	5	3	5	18	4	5	5	4	18
Male	20	Urban	2	No	No	Less than 50,000	No	2	0	0	0	0	0	2	3	2	4	3	4	16	3	3	3	2	11
Male	23	Rural	1	No	I dont know	Less than 50,000	No	5	30	42	8	36	20	34	5	3	5	5	5	23	5	5	5	4	19
Female	20	Rural	1	I dont know	No	Less than 50,000	No	4	20	16	12	14	20	20	3	3	3	3	3	15	3	4	4	3	14
Male	18	Rural	1	No	No	Less than 50,000	No	7	4	6	0	2	6	8	2	1	3	2	3	11	4	4	5	4	17
Female	18	Urban	1	No	No	Less than 50,000	No	6	26	28	26	10	22	26	5	5	5	5	5	25	4	4	5	4	17
Female	21	Urban	4	No	No	Less than 50,000	No	6	14	10	4	8	12	18	4	3	5	4	5	21	4	5	3	2	14
Male	20	Urban	3	No	No	Less than 50,000	No	2	0	0	4	2	0	2	2	1	3	2	3	11	5	5	5	5	20
Female	20	Urban	3	No	No	Less than 50,000	No	2	0	0	0	0	0	0	2	2	4	2	4	14	3	4	3	3	13
Male	20	Rural	1	Yes	Yes	Less than 50,000	No	3	14	4	8	12	16	16	4	2	4	4	4	18	3	4	3	3	13
Female	18	Rural	1	I dont know	I dont know	Less than 50,000	No	5	6	10	0	0	8	10	2	2	3	2	3	12	4	5	5	4	18
Female	22	Urban	5	No	Yes	Less than 50,000	No	9	24	24	36	0	22	26	5	3	5	5	5	23	3	3	3	3	12
Female	20	Rural	3	No	No	Less than 50,000	No	1	6	12	0	0	4	6	4	2	3	4	3	16	2	2	2	2	8
Female	22	Rural	4	Yes	Yes	Less than 50,000	No	9	36	30	28	18	26	28	4	2	3	4	3	16	4	5	5	5	19
Female	21	Rural	3	I dont know	Yes	Less than 50,000	No	3	10	4	4	0	2	6	2	1	4	2	4	13	4	5	5	4	18
Male	23	Rural	5	I dont know	No	Less than 50,000	No	3	4	6	0	6	14	18	2	2	4	2	4	14	3	3	3	2	11
Female	23	Rural	5	Yes	Yes	Less than 50,000	No	7	24	26	12	10	20	20	4	4	4	4	4	20	5	5	5	4	19
Female	22	Rural	5	No	No	Less than 50,000	No	6	26	32	12	10	16	18	4	4	4	4	4	20	3	4	4	3	14
Male	22	Rural	5	No	No	Less than 50,000	No	6	6	12	2	12	14	14	4	3	5	4	5	21	4	4	5	4	17
Male	22	Rural	5	No	No	Less than 50,000	No	6	4	2	0	6	8	10	2	2	3	2	3	12	4	4	5	4	17
Male	22	Rural	4	No	Yes	Less than 50,000	No	5	14	12	0	8	4	6	4	2	4	4	4	18	4	5	3	2	14
Female	22	Rural	3	I dont know	Yes	Less than 50,000	No	4	0	0	0	0	2	0	2	2	2	2	2	10	5	5	5	5	20
Female	22	Rural	5	No	Yes	Less than 50,000	No	7	4	0	0	2	4	6	3	3	3	3	3	15	3	4	3	3	13
Male	19	Rural	2	No	I dont know	Less than 50,000	No	4	6	14	2	0	16	16	5	3	5	5	5	23	4	4	4	4	16
Male	22	Rural	4	I dont know	Yes	Less than 50,000	Yes	4	4	6	0	4	6	8	4	3	5	4	5	21	4	4	4	4	16
Female	20	Rural	2	No	I dont know	Less than 50,000	No	4	16	10	0	10	14	18	4	4	5	4	5	22	4	4	4	4	16
Male	19	Rural	2	I dont know	No	Less than 50,000	No	2	6	10	6	6	10	16	4	4	4	4	4	20	4	4	4	4	16
Female	20	Rural	2	No	I dont know	Less than 50,000	No	5	0	2	2	2	8	10	4	3	4	4	4	19	4	4	4	4	16
Female	23	Rural	5	No	Yes	Less than 50,000	No	6	2	4	0	2	2	4	4	2	3	4	3	16	3	3	3	3	12
Female	20	Rural	4	No	Yes	50,001 to 1,00,000	No	5	6	24	12	6	16	16	3	3	3	3	3	15	3	3	3	3	12
Male	19	Rural	2	Yes	No	50,001 to 1,00,000	No	10	36	18	16	14	22	26	4	3	4	4	4	19	3	3	3	3	12
Female	24	Rural	5	Yes	No	50,001 to 1,00,000	No	2	8	6	8	0	6	12	5	3	3	5	3	19	5	5	5	5	20
Male	23	Rural	5	No	Yes	50,001 to 1,00,000	No	1	6	6	2	0	0	2	2	2	5	2	5	16	3	5	3	3	14
Female	19	Rural	2	Yes	I dont know	50,001 to 1,00,000	No	7	28	20	26	30	24	28	4	2	4	4	4	18	3	4	3	3	13
Female	18	Urban	1	Yes	No	Above 1,00,000	No	8	6	30	10	30	26	26	3	3	4	3	4	17	4	5	5	4	18
Female	18	Urban	1	Yes	No	Above 1,00,000	Yes	10	16	18	10	6	16	18	3	2	3	3	3	14	3	3	3	3	12
Male	20	Urban	2	No	No	Above 1,00,000	No	3	4	8	10	10	12	16	3	2	3	3	3	14	2	2	2	2	8
Male	20	Urban	2	No	No	Above 1,00,000	No	3	6	8	10	10	12	12	3	2	3	3	3	14	4	5	5	5	19
Female	19	Urban	1	Yes	No	Above 1,00,000	No	8	14	14	8	4	8	10	3	2	5	3	5	18	4	5	5	4	18
Female	19	Urban	1	No	No	Above 1,00,000	No	5	14	6	6	4	8	12	2	2	2	2	2	10	3	3	3	2	11
Male	18	Urban	1	Yes	No	Above 1,00,000	Yes	5	6	10	0	0	8	10	3	3	3	3	3	15	5	5	5	4	19
Female	21	Urban	3	Yes	No	Above 1,00,000	No	4	6	20	4	10	6	8	3	3	3	3	3	15	3	4	4	3	14
Female	19	Urban	1	No	No	Above 1,00,000	No	2	6	14	6	4	6	8	3	2	3	3	3	14	4	4	5	4	17
Male	20	Urban	2	No	No	Above 1,00,000	No	7	4	2	0	2	6	8	3	2	3	3	3	14	4	4	5	4	17
Female	18	Urban	1	No	No	Above 1,00,000	No	6	2	2	6	6	4	6	3	3	3	3	3	15	4	5	3	2	14
Female	22	Urban	2	No	No	Above 1,00,000	No	3	8	2	2	4	4	4	2	2	2	2	2	10	5	5	5	5	20
Female	20	Urban	1	I dont know	I dont know	Above 1,00,000	No	5	6	0	0	0	0	2	3	2	3	3	3	14	3	4	3	3	13
Male	22	Urban	3	No	No	Above 1,00,000	No	5	0	0	0	0	0	2	4	2	4	4	4	18	3	4	3	3	13
Male	21	Urban	3	Yes	No	Above 1,00,000	No	10	0	0	0	0	0	2	2	2	2	2	2	10	5	5	5	5	20
Female	19	Urban	1	No	No	Above 1,00,000	No	5	10	0	2	0	0	0	2	4	3	2	3	14	3	5	3	3	14
Female	21	Rural	4	Yes	No	Above 1,00,000	No	6	12	0	6	8	8	8	5	2	4	5	4	20	3	4	3	3	13
Female	19	Rural	1	No	No	Above 1,00,000	No	6	1	4	6	6	4	6	4	2	4	4	4	18	4	5	5	4	18
Female	21	Rural	3	No	No	Above 1,00,000	No	6	12	0	4	2	2	4	3	3	3	3	3	15	3	3	3	3	12
Female	18	Rural	1	I dont know	No	Above 1,00,000	No	1	2	0	0	0	0	2	3	3	3	3	3	15	2	2	2	2	8
Female	19	Rural	2	No	No	Above 1,00,000	No	2	0	0	0	0	0	0	4	3	3	4	3	17	4	5	5	5	19
Male	20	Urban	2	I dont know	No	Above 1,00,000	No	1	0	0	0	0	0	0	3	2	3	3	3	14	4	5	5	4	18
Female	22	Rural	5	Yes	Yes	Above 1,00,000	No	10	6	8	2	10	18	18	5	3	4	5	4	21	3	3	3	2	11
Male	22	Rural	2	No	No	Above 1,00,000	No	3	0	4	2	0	0	0	3	3	3	3	3	15	5	5	5	4	19
Male	18	Urban	1	No	No	Above 1,00,000	No	7	6	16	2	16	16	18	4	3	4	4	4	19	3	4	4	3	14
Male	21	Urban	4	No	No	Above 1,00,000	No	8	8	16	2	10	18	18	2	2	3	2	3	12	4	4	5	4	17
Female	26	Urban	1	No	No	Above 1,00,000	No	5	14	6	12	16	16	16	2	2	3	2	3	12	4	4	5	4	17
Female	21	Urban	2	No	No	Above 1,00,000	No	3	6	12	2	12	14	20	2	2	3	2	3	12	4	5	3	2	14
Male	18	Urban	1	No	No	Above 1,00,000	No	2	6	8	2	10	14	14	3	2	3	3	3	14	5	5	5	5	20
Male	19	Urban	1	I dont know	No	Above 1,00,000	No	6	4	10	2	6	8	12	4	2	4	4	4	18	3	4	3	3	13
Female	18	Urban	1	Yes	No	Above 1,00,000	No	4	6	16	2	4	10	16	2	2	3	2	3	12	3	4	3	3	13
Female	18	Urban	1	No	No	Above 1,00,000	No	6	6	18	2	8	6	8	3	2	3	3	3	14	5	5	5	5	20
Male	18	Urban	1	No	No	Above 1,00,000	No	9	4	12	2	2	2	4	2	2	2	2	2	10	3	5	3	3	14
Female	19	Urban	2	No	No	Above 1,00,000	No	6	2	6	4	2	0	2	5	4	5	5	5	24	3	4	3	3	13
Male	18	Urban	1	No	No	Above 1,00,000	No	4	0	2	2	0	0	2	4	3	5	4	5	21	4	5	5	4	18
Female	20	Urban	2	No	No	Above 1,00,000	No	2	0	0	0	0	0	2	3	1	3	3	3	13	3	3	3	3	12
Female	21	Urban	4	No	No	Above 1,00,000	No	4	0	0	0	0	0	2	2	1	2	2	2	9	2	2	2	2	8
Male	18	Urban	1	No	No	Above 1,00,000	No	3	2	6	0	4	0	0	3	2	3	3	3	14	4	5	5	5	19
Female	19	Urban	2	No	No	Above 1,00,000	No	4	0	0	0	0	2	0	4	2	4	4	4	18	4	5	5	4	18
Female	20	Rural	1	No	No	Above 1,00,000	No	3	24	8	2	14	4	6	4	4	4	4	4	20	3	3	3	2	11
Female	19	Urban	2	No	No	Above 1,00,000	No	4	8	12	2	10	16	20	3	3	3	3	3	15	5	5	5	4	19
Female	26	Urban	3	Yes	No	Above 1,00,000	No	5	2	2	0	0	4	6	3	3	3	3	3	15	3	4	4	3	14
Female	20	Urban	3	No	No	Above 1,00,000	No	2	0	0	0	0	0	0	3	3	3	3	3	15	4	4	5	4	17
Male	19	Urban	1	No	No	Above 1,00,000	No	4	12	14	12	16	20	24	3	3	3	3	3	15	4	4	5	4	17
Female	19	Urban	2	No	No	Above 1,00,000	No	6	20	22	6	10	20	24	5	3	5	5	5	23	4	5	3	2	14
Female	21	Urban	2	No	No	Above 1,00,000	No	2	10	4	2	8	16	18	3	3	5	3	5	19	5	5	5	5	20
Female	20	Urban	2	No	No	Above 1,00,000	No	10	14	14	2	10	12	12	3	3	5	3	5	19	3	4	3	3	13
Female	20	Urban	2	No	No	Above 1,00,000	No	5	8	8	6	4	4	6	2	2	3	2	3	12	3	4	3	3	13
Female	19	Urban	1	No	No	Above 1,00,000	No	9	4	4	0	4	0	0	3	1	2	3	2	11	5	5	5	5	20
Female	19	Urban	1	No	No	Above 1,00,000	No	9	4	4	4	4	0	0	3	1	3	3	3	13	3	5	3	3	14
Female	20	Urban	2	No	No	Above 1,00,000	No	0	0	0	4	2	0	0	3	1	3	3	3	13	3	4	3	3	13
Male	19	Urban	3	No	No	Above 1,00,000	Yes	7	2	8	2	0	0	0	2	2	2	2	2	10	4	5	5	4	18
Female	19	Urban	1	No	No	Above 1,00,000	No	0	10	0	2	0	0	0	2	2	2	2	2	10	3	3	3	3	12
Female	20	Urban	2	No	No	Above 1,00,000	No	4	0	0	0	0	0	0	5	3	5	5	5	23	2	2	2	2	8
Male	20	Rural	3	No	No	Above 1,00,000	No	10	22	10	10	14	16	16	5	5	5	5	5	25	4	5	5	5	19
Female	19	Urban	1	No	No	Above 1,00,000	No	0	2	0	0	0	0	4	2	2	2	2	2	10	4	5	5	4	18
Female	19	Rural	1	No	No	Above 1,00,000	No	3	14	4	8	16	10	10	2	3	3	2	3	13	3	3	3	2	11
Female	20	Rural	3	No	No	50,001 to 1,00,000	No	6	6	8	2	2	8	10	4	2	2	4	2	14	5	5	5	4	19
Female	19	Rural	2	Yes	No	50,001 to 1,00,000	No	9	6	8	2	2	8	16	2	2	2	2	2	10	3	4	4	3	14
Female	19	Rural	2	Yes	No	50,001 to 1,00,000	No	9	6	10	6	2	2	6	4	3	4	4	4	19	4	4	5	4	17
Female	20	Rural	3	No	No	50,001 to 1,00,000	No	7	14	2	4	0	4	8	4	3	4	4	4	19	4	4	5	4	17
Male	19	Urban	1	Yes	I dont know	50,001 to 1,00,000	Yes	7	6	18	18	6	16	24	2	2	2	2	2	10	4	5	3	2	14
Female	18	Urban	1	No	No	50,001 to 1,00,000	No	6	14	14	6	8	16	18	3	3	3	3	3	15	5	5	5	5	20
Male	22	Urban	4	Yes	No	50,001 to 1,00,000	No	3	14	18	10	12	16	16	4	4	5	4	5	22	3	4	3	3	13
Female	18	Urban	1	No	No	50,001 to 1,00,000	No	7	12	12	10	14	16	14	3	3	3	3	3	15	3	4	3	3	13
Male	21	Urban	3	Yes	I dont know	50,001 to 1,00,000	No	4	6	18	2	10	14	16	4	4	5	4	5	22	5	5	5	5	20
Female	19	Urban	1	No	No	50,001 to 1,00,000	No	4	10	10	8	6	8	10	2	3	3	2	3	13	3	5	3	3	14
Female	19	Urban	2	No	No	50,001 to 1,00,000	No	1	6	4	8	0	6	10	3	3	3	3	3	15	3	4	3	3	13
Male	19	Urban	1	No	No	50,001 to 1,00,000	No	6	4	2	0	2	6	8	2	2	2	2	2	10	4	5	5	4	18
Female	20	Urban	2	No	No	50,001 to 1,00,000	No	1	0	4	6	2	2	6	2	2	2	2	2	10	3	3	3	3	12
Female	20	Urban	2	No	No	50,001 to 1,00,000	No	0	2	0	0	0	4	6	3	3	3	3	3	15	2	2	2	2	8
Female	20	Urban	2	No	No	50,001 to 1,00,000	No	14	12	4	4	0	2	4	2	2	2	2	2	10	4	5	5	5	19
Female	19	Urban	2	No	No	50,001 to 1,00,000	No	4	2	0	0	0	0	4	1	1	1	1	1	5	4	5	5	4	18
Female	19	Urban	1	No	No	50,001 to 1,00,000	No	2	0	6	4	2	0	0	3	3	3	3	3	15	3	3	3	2	11
Male	20	Rural	3	No	No	50,001 to 1,00,000	No	3	12	4	6	6	6	8	4	4	4	4	4	20	5	5	5	4	19
Female	19	Rural	1	Yes	No	50,001 to 1,00,000	No	5	8	6	2	10	4	6	4	4	4	4	4	20	3	4	4	3	14
Male	18	Rural	1	No	No	50,001 to 1,00,000	No	3	12	10	4	0	2	4	3	3	3	3	3	15	4	4	5	4	17
Male	19	Urban	2	No	No	50,001 to 1,00,000	No	5	10	8	12	10	16	16	2	4	1	2	1	10	4	4	5	4	17
Male	25	Urban	5	Yes	Yes	50,001 to 1,00,000	Yes	2	6	0	4	2	2	4	1	1	1	1	1	5	4	5	3	2	14
Male	19	Urban	1	No	No	50,001 to 1,00,000	No	12	20	38	24	14	22	26	2	3	2	2	2	11	5	5	5	5	20
Female	19	Urban	1	No	No	50,001 to 1,00,000	No	7	14	16	4	10	14	14	1	1	1	1	1	5	3	4	3	3	13
Male	19	Urban	1	No	No	50,001 to 1,00,000	No	7	8	10	2	6	8	12	1	1	1	1	1	5	3	4	3	3	13
Female	18	Urban	1	No	No	50,001 to 1,00,000	No	4	6	12	16	6	8	10	3	3	3	3	3	15	5	5	5	5	20
Female	18	Urban	1	No	No	50,001 to 1,00,000	No	8	4	4	6	4	8	10	4	3	3	4	3	17	3	5	3	3	14
Male	20	Urban	1	No	No	50,001 to 1,00,000	No	6	6	10	2	10	6	8	4	4	4	4	4	20	3	4	3	3	13
Female	20	Urban	4	Yes	No	50,001 to 1,00,000	No	5	10	16	0	8	6	8	2	2	2	2	2	10	4	5	5	4	18
Female	18	Urban	1	No	No	50,001 to 1,00,000	No	8	12	14	6	6	6	8	2	2	2	2	2	10	3	3	3	3	12
Female	19	Urban	2	No	No	50,001 to 1,00,000	No	9	4	8	0	2	6	8	2	2	2	2	2	10	2	2	2	2	8
Male	20	Urban	3	Yes	No	50,001 to 1,00,000	No	1	0	8	0	8	4	6	3	3	3	3	3	15	4	5	5	5	19
Female	21	Urban	2	No	No	50,001 to 1,00,000	No	5	2	2	0	6	4	4	3	3	3	3	3	15	4	5	5	4	18
Female	20	Urban	2	No	No	50,001 to 1,00,000	No	3	2	0	0	6	4	4	3	3	3	3	3	15	3	3	3	2	11
Male	19	Urban	1	No	No	50,001 to 1,00,000	No	3	0	0	4	2	2	4	3	3	3	3	3	15	5	5	5	4	19
Male	20	Urban	3	I dont know	No	50,001 to 1,00,000	No	7	0	8	0	2	0	2	2	2	2	2	2	10	3	4	4	3	14
Male	20	Urban	2	No	No	50,001 to 1,00,000	No	2	0	0	2	2	0	2	3	4	3	3	3	16	4	4	5	4	17
Male	20	Urban	2	No	No	50,001 to 1,00,000	No	2	0	0	2	2	0	2	4	4	4	4	4	20	4	4	5	4	17
Male	20	Urban	2	No	No	50,001 to 1,00,000	No	2	0	0	2	2	0	2	4	4	4	4	4	20	4	5	3	2	14
Female	21	Urban	4	No	No	50,001 to 1,00,000	No	3	0	0	0	0	0	4	2	2	3	2	3	12	5	5	5	5	20
Female	20	Urban	1	No	No	50,001 to 1,00,000	No	8	0	6	4	2	0	4	2	1	2	2	2	9	3	4	3	3	13
Female	19	Urban	1	No	No	50,001 to 1,00,000	No	0	10	0	2	0	0	2	4	4	5	4	5	22	3	4	3	3	13
Male	18	Rural	1	No	No	50,001 to 1,00,000	No	10	22	28	30	36	26	34	5	4	5	5	5	24	5	5	5	5	20
Female	18	Rural	1	No	No	50,001 to 1,00,000	No	9	14	14	12	12	16	14	2	1	3	2	3	11	3	5	3	3	14
Female	19	Rural	1	No	No	50,001 to 1,00,000	No	7	8	6	8	6	8	10	4	3	5	4	5	21	3	4	3	3	13
Female	20	Rural	2	No	No	50,001 to 1,00,000	No	2	12	8	6	6	6	8	1	1	2	1	2	7	4	5	5	4	18
Female	23	Rural	4	No	No	50,001 to 1,00,000	No	4	8	16	0	4	4	4	2	1	2	2	2	9	3	3	3	3	12
Female	22	Rural	2	No	No	50,001 to 1,00,000	No	1	2	0	0	4	0	2	2	1	2	2	2	9	2	2	2	2	8
Female	19	Rural	1	No	No	50,001 to 1,00,000	No	3	6	0	2	0	0	0	5	4	5	5	5	24	4	5	5	5	19
Female	24	Urban	5	No	Yes	50,001 to 1,00,000	No	5	8	16	2	6	10	10	4	3	3	4	3	17	4	5	5	4	18
Female	22	Urban	5	No	Yes	50,001 to 1,00,000	No	6	18	4	4	6	8	10	4	4	4	4	4	20	3	3	3	2	11
Female	20	Urban	3	No	No	50,001 to 1,00,000	No	3	4	0	0	2	4	6	4	4	5	4	5	22	5	5	5	4	19
Female	18	Urban	1	No	No	50,001 to 1,00,000	No	3	4	0	2	2	2	2	3	3	3	3	3	15	3	4	4	3	14
Female	18	Urban	1	No	No	50,001 to 1,00,000	No	3	0	0	2	2	0	2	3	3	3	3	3	15	4	4	5	4	17
Female	20	Urban	2	No	No	50,001 to 1,00,000	No	2	0	0	0	0	0	2	2	3	3	2	3	13	4	4	5	4	17
Female	21	Urban	1	No	No	50,001 to 1,00,000	No	5	0	2	4	2	0	0	3	3	3	3	3	15	4	5	3	2	14
Male	23	Rural	5	No	Yes	50,001 to 1,00,000	No	3	4	10	2	10	14	14	3	3	3	3	3	15	5	5	5	5	20
Female	18	Urban	1	No	No	50,001 to 1,00,000	No	9	10	40	34	30	28	34	3	3	3	3	3	15	3	4	3	3	13
Female	18	Urban	1	I dont know	No	50,001 to 1,00,000	No	5	14	14	2	10	12	12	3	3	3	3	3	15	3	4	3	3	13
Male	19	Urban	1	No	No	50,001 to 1,00,000	No	5	0	2	10	10	12	12	3	3	3	3	3	15	5	5	5	5	20
Female	20	Urban	2	No	No	50,001 to 1,00,000	No	5	10	2	6	4	8	10	2	2	3	2	3	12	3	5	3	3	14
Female	20	Urban	2	No	No	50,001 to 1,00,000	No	4	10	10	0	8	4	6	2	2	3	2	3	12	3	4	3	3	13
Female	20	Urban	2	No	No	50,001 to 1,00,000	No	4	0	0	6	4	4	6	2	2	3	2	3	12	4	5	5	4	18
Male	19	Urban	2	No	No	50,001 to 1,00,000	No	4	0	2	4	2	6	6	2	2	3	2	3	12	3	3	3	3	12
Female	20	Urban	1	Yes	No	50,001 to 1,00,000	No	4	0	0	4	2	2	4	2	2	2	2	2	10	2	2	2	2	8
Male	20	Urban	1	No	No	50,001 to 1,00,000	No	0	6	0	2	0	0	0	2	2	2	2	2	10	4	5	5	5	19
Female	20	Rural	2	No	No	50,001 to 1,00,000	No	1	0	0	0	0	2	0	3	3	4	3	4	17	4	5	5	4	18
Female	20	Rural	2	No	No	50,001 to 1,00,000	No	1	0	0	0	0	0	0	4	4	4	4	4	20	3	3	3	2	11
Female	20	Urban	2	No	No	50,001 to 1,00,000	No	2	0	0	0	12	0	0	2	2	3	2	3	12	5	5	5	4	19
Female	20	Urban	2	No	No	50,001 to 1,00,000	No	3	20	32	14	16	16	16	2	2	2	2	2	10	3	4	4	3	14
Female	20	Urban	2	No	No	50,001 to 1,00,000	No	2	0	8	2	8	10	10	2	2	2	2	2	10	4	4	5	4	17
Male	20	Rural	2	No	No	50,001 to 1,00,000	No	2	4	6	6	2	0	2	3	3	3	3	3	15	4	4	5	4	17
Male	21	Rural	3	No	No	50,001 to 1,00,000	No	5	0	2	4	2	0	0	3	3	3	3	3	15	4	5	3	2	14
Female	19	Urban	2	No	No	50,001 to 1,00,000	No	4	2	4	0	2	4	4	3	3	3	3	3	15	5	5	5	5	20
Female	22	Rural	4	I dont know	Yes	50,001 to 1,00,000	No	4	6	6	0	10	4	4	3	3	3	3	3	15	3	4	3	3	13
Female	22	Rural	4	I dont know	No	50,001 to 1,00,000	Yes	4	2	6	0	2	2	6	3	3	3	3	3	15	3	4	3	3	13
Female	23	Rural	5	Yes	Yes	50,001 to 1,00,000	No	2	22	16	6	16	22	26	3	3	3	3	3	15	3	3	3	3	12
Female	22	Rural	4	No	Yes	50,001 to 1,00,000	No	5	8	14	2	12	18	26	4	3	5	4	5	21	3	3	3	3	12
Female	20	Rural	3	No	Yes	50,001 to 1,00,000	No	0	0	0	0	0	2	0	3	3	3	3	3	15	3	3	3	3	12

## Sheet: Baseline Dass
1	2	3	4	5	6	7	8	9	10	11	12	13	14	15	16	17	18	19	20	21	Dep	Anxiety	Stress
2	1	2	1	2	1	2	1	2	1	2	2	2	2	2	1	2	2	2	2	2	24	24	24
3	1	3	0	1	3	0	0	1	1	1	1	3	2	2	2	2	1	0	0	0	24	8	22
1	0	1	0	1	1	0	0	0	1	1	0	1	1	0	1	1	1	0	1	1	14	2	10
0	0	1	0	0	1	0	0	0	1	0	0	1	0	0	0	2	0	0	1	2	14	2	2
1	0	1	0	0	3	1	1	1	0	1	2	2	0	1	0	1	2	1	2	3	14	12	20
1	1	1	0	1	1	1	1	1	1	1	1	1	1	1	1	1	2	0	1	1	14	10	16
0	1	1	0	0	3	0	1	1	1	0	1	1	1	1	1	2	0	0	0	0	12	6	12
2	0	1	0	2	2	1	1	1	1	1	2	1	0	1	1	0	0	0	0	0	12	6	16
1	0	1	0	1	0	0	1	0	1	1	0	1	1	1	1	0	1	0	0	1	12	2	10
0	0	0	0	0	1	0	0	0	0	0	0	0	0	1	1	2	1	0	0	3	12	2	4
2	1	0	2	2	1	1	1	1	0	2	1	1	0	0	0	2	1	0	0	1	12	10	16
1	0	1	0	1	1	1	1	1	0	1	1	1	1	1	1	1	1	1	0	1	12	8	14
2	2	0	1	1	0	0	2	1	1	1	1	2	2	0	0	1	1	0	0	1	12	8	18
0	0	0	0	3	0	0	0	1	0	0	1	1	0	1	1	1	1	1	0	0	12	6	4
0	0	1	0	2	1	0	0	0	1	0	0	0	1	0	0	1	0	0	0	0	10	0	4
1	2	1	1	1	2	1	1	0	0	1	1	0	1	1	1	0	1	0	1	2	10	12	16
1	0	0	0	0	1	1	1	1	1	1	1	1	1	1	1	1	1	1	0	1	10	8	14
0	1	1	0	0	0	0	0	1	1	1	1	1	1	0	0	1	0	0	1	1	10	6	6
1	1	0	0	0	1	0	1	0	1	1	1	1	1	0	1	1	1	1	1	1	10	6	14
1	0	1	0	1	2	1	1	0	1	1	2	1	1	0	0	0	0	1	0	1	10	4	16
1	0	0	1	1	1	0	1	0	1	1	0	1	1	0	1	0	1	1	0	1	10	4	12
1	3	3	0	3	2	3	2	3	3	2	2	3	2	3	3	3	2	3	2	2	40	34	26
3	1	1	0	1	2	1	1	2	2	2	2	2	2	1	2	2	1	1	1	3	26	14	26
2	1	1	0	2	1	1	1	1	1	1	2	2	2	1	2	2	1	0	1	2	24	10	20
2	0	3	1	3	3	1	1	3	3	1	0	3	2	1	1	2	2	0	0	3	36	12	22
0	0	1	0	0	0	0	0	0	0	2	1	1	1	0	1	1	0	1	1	1	10	4	8
0	0	1	0	0	0	0	0	1	0	1	0	0	1	0	0	1	0	0	0	2	8	2	4
0	0	3	0	0	3	0	0	0	0	1	0	1	0	0	0	0	0	0	0	0	8	0	8
1	1	1	1	2	1	0	1	1	0	1	1	1	2	0	0	0	1	0	1	0	8	8	16
1	0	0	0	1	2	0	2	1	1	1	1	1	1	1	0	0	0	0	2	1	8	8	16
1	0	1	0	0	0	0	1	0	1	0	0	0	0	1	1	0	0	1	0	0	6	4	4
0	0	0	0	0	0	0	0	0	0	0	0	0	0	1	0	3	0	0	0	0	6	2	0
3	2	2	2	3	2	2	2	1	1	1	1	1	1	2	2	1	1	2	2	0	20	26	22
1	0	0	0	0	0	0	0	0	0	0	1	1	0	0	1	1	0	1	0	2	10	2	4
2	0	0	0	0	0	0	0	0	1	0	1	0	0	1	0	1	1	0	0	1	6	2	8
0	0	1	0	0	1	0	0	1	0	0	0	1	1	0	1	0	0	0	0	0	6	2	4
2	1	1	0	0	1	0	1	0	1	0	0	1	0	0	0	0	1	0	0	0	6	2	10
1	0	1	0	0	1	0	1	1	0	1	1	1	0	1	1	0	0	1	0	0	6	6	10
0	0	1	2	2	2	1	0	1	1	3	0	2	2	1	2	2	1	0	1	3	26	12	16
2	3	2	0	2	2	3	2	3	0	2	2	2	2	3	2	3	2	3	3	1	24	36	28
3	1	1	0	0	1	0	1	1	1	1	0	1	0	0	1	1	0	1	0	2	14	6	12
1	1	1	0	1	1	0	0	0	1	1	1	1	0	1	1	0	0	0	0	0	10	4	8
2	0	1	0	2	1	0	1	1	0	0	1	1	1	1	1	0	0	0	0	0	10	4	12
0	1	1	0	1	1	0	1	0	1	0	0	1	1	0	0	0	0	0	0	0	8	2	6
1	0	0	0	1	3	0	0	0	0	0	0	0	0	0	0	3	0	0	0	0	8	0	8
1	0	0	0	1	0	0	1	1	1	1	0	0	1	0	0	1	1	1	1	1	8	6	10
2	0	0	0	1	2	0	0	1	1	0	0	0	0	0	0	1	1	1	1	1	8	6	10
0	1	1	0	1	1	0	0	0	0	1	0	0	2	0	1	0	0	2	0	0	6	6	8
1	1	0	0	0	0	0	0	0	2	1	1	1	1	0	0	0	0	0	0	0	6	2	8
0	0	0	0	1	0	0	0	0	0	0	1	0	0	0	0	1	0	1	0	1	6	2	2
0	0	1	0	1	1	0	0	0	0	1	1	0	0	0	1	0	0	0	0	0	6	0	6
0	1	2	0	0	0	0	0	0	1	1	0	0	0	1	0	0	0	0	1	0	6	6	2
0	0	0	0	1	0	1	0	0	0	0	0	0	0	0	2	0	0	0	0	0	6	2	0
2	1	2	2	2	2	2	1	2	1	2	2	2	2	2	2	2	2	2	2	2	26	26	26
1	1	1	0	3	2	1	1	2	2	1	1	1	1	1	2	1	1	1	1	0	20	14	16
1	1	1	0	1	0	0	0	1	2	1	0	2	0	1	0	3	1	0	0	1	20	6	6
2	0	1	0	1	0	0	2	1	0	2	2	2	1	0	1	1	1	1	0	1	14	4	20
1	1	2	0	2	1	0	2	0	0	1	1	1	1	0	1	0	1	0	1	1	14	4	16
0	0	1	3	0	1	1	2	3	3	2	2	3	2	3	3	2	2	3	2	3	30	30	22
2	1	2	0	2	2	3	2	2	1	1	1	3	2	0	1	0	1	0	0	0	18	12	22
2	1	1	0	1	2	1	1	1	1	2	1	2	1	1	1	1	1	0	1	0	14	10	20
1	0	0	0	0	1	0	1	1	2	1	1	2	0	2	0	2	2	2	0	0	12	10	14
0	0	0	0	0	0	0	0	1	1	0	1	1	0	1	1	1	1	0	0	1	10	4	4
1	1	0	0	1	0	0	1	1	1	1	1	1	1	0	1	1	0	0	0	0	10	4	10
1	0	1	1	1	1	0	1	1	1	1	1	0	1	1	1	0	1	0	0	0	8	6	14
1	1	2	1	0	1	0	0	0	0	0	0	0	1	0	0	1	0	0	0	0	6	4	6
0	0	0	0	1	0	0	0	0	1	0	0	1	0	0	0	0	0	0	0	0	6	0	0
0	0	0	1	1	0	0	1	0	1	1	1	1	0	0	0	0	0	1	0	0	6	4	6
1	2	3	3	3	2	3	2	2	2	2	2	3	2	2	3	2	2	1	1	2	36	28	26
3	1	1	2	3	2	1	1	1	2	1	1	2	2	1	1	2	1	2	1	3	28	18	22
1	1	2	0	1	2	0	1	1	2	1	1	1	1	1	0	1	0	1	1	1	16	10	14
1	0	1	0	2	1	0	2	1	2	2	1	2	1	1	2	2	0	0	2	2	26	8	16
1	0	0	0	0	0	0	0	1	1	1	1	2	0	0	1	2	0	1	1	1	14	6	6
0	0	1	0	0	0	0	1	0	0	0	0	1	0	0	1	1	0	0	0	0	8	0	2
0	0	2	0	1	1	0	0	1	0	1	1	0	1	1	0	0	0	0	1	0	6	6	8
1	0	0	0	0	1	0	1	0	1	0	0	1	0	0	0	0	0	0	1	1	6	2	6
1	0	1	0	1	1	0	0	1	0	0	1	1	0	0	0	0	0	0	0	0	6	2	6
1	0	1	0	1	2	0	1	1	2	1	2	1	1	1	2	2	1	1	1	2	22	8	18
0	0	2	0	1	0	0	1	0	1	1	1	1	0	1	1	1	1	0	1	0	14	4	8
1	1	1	0	2	0	1	1	0	1	1	0	1	0	0	0	1	1	0	0	1	14	4	8
1	0	1	1	1	1	0	0	0	1	0	0	1	1	0	0	1	0	1	0	1	12	4	6
2	0	1	1	1	1	0	1	0	1	1	1	1	1	1	0	1	0	1	0	0	10	6	14
0	2	1	0	1	0	0	0	1	0	0	0	1	1	1	1	0	1	1	0	0	8	10	4
0	0	0	0	0	0	0	0	0	0	0	0	1	0	0	1	0	0	0	0	1	6	0	0
0	0	0	0	0	0	0	0	1	1	1	1	1	0	0	1	0	0	0	1	0	6	4	4
1	1	2	1	2	1	1	2	1	1	2	2	2	2	2	2	1	2	2	1	2	24	18	24
1	1	0	1	2	2	0	1	1	2	1	1	1	1	0	0	1	1	1	0	1	14	8	16
2	1	1	0	1	1	0	1	1	1	1	1	2	1	0	0	1	1	1	1	1	14	8	16
0	0	0	0	0	0	0	0	0	0	0	0	1	0	1	0	1	0	0	0	1	6	2	0
1	1	1	2	2	1	2	2	1	2	1	2	2	2	2	1	2	1	2	2	1	22	24	20
2	0	0	0	0	0	0	2	0	0	0	2	3	2	0	3	3	2	0	0	2	22	0	20
1	0	0	0	1	1	0	1	0	1	1	1	1	2	0	1	1	1	0	0	1	12	0	16
2	2	0	1	1	1	2	1	0	0	1	1	1	1	0	1	0	1	0	1	0	6	12	16
1	1	3	0	0	1	1	0	0	0	0	0	0	0	1	0	0	0	0	0	0	6	6	4
1	0	1	0	2	1	0	1	1	2	1	1	2	1	0	1	2	2	1	0	1	22	4	16
2	0	1	0	0	2	0	1	2	2	1	1	2	2	1	1	2	1	0	1	2	20	8	20
1	1	0	0	0	0	0	1	1	1	0	0	1	1	0	1	0	1	0	1	0	6	6	8
1	0	0	0	0	0	0	1	0	0	1	1	1	1	1	2	0	0	0	1	0	6	4	10
0	0	0	0	1	1	0	1	0	0	1	1	1	0	0	1	0	0	2	0	0	6	4	8
1	0	0	0	1	0	0	1	0	1	1	3	2	2	2	2	0	0	0	1	1	14	6	16
1	0	1	0	1	1	1	1	1	1	1	1	1	1	1	2	1	1	1	0	1	16	8	14
0	0	1	0	0	2	0	2	0	0	0	1	2	2	2	1	2	2	1	3	1	14	12	18
1	0	2	0	1	1	0	1	0	0	1	0	0	0	0	0	0	0	1	0	0	6	2	8
0	0	0	3	1	1	0	1	0	0	1	0	1	1	1	0	1	0	1	1	0	6	12	8
0	0	2	0	0	1	0	0	1	1	1	1	2	0	0	0	1	0	0	2	1	14	6	6
0	1	0	0	0	0	0	1	0	0	0	0	0	0	2	3	3	1	3	2	3	18	16	4
1	2	2	2	0	0	0	0	1	1	1	0	1	1	1	1	1	1	1	1	1	14	16	8
0	0	0	0	1	1	0	0	1	0	1	1	1	0	0	1	0	0	0	0	0	6	2	6
2	1	1	0	0	2	1	1	1	1	2	2	2	1	1	0	2	1	1	1	1	14	12	22
1	0	0	0	0	0	0	0	1	0	1	0	1	1	1	1	1	0	0	0	0	6	4	6
3	2	1	1	2	1	1	1	0	0	1	1	1	1	1	1	1	0	1	0	1	14	12	16
0	2	3	0	1	0	0	0	1	1	0	0	0	0	0	0	0	0	0	0	0	10	6	0
0	1	1	0	0	0	0	1	0	0	1	1	0	0	0	1	1	1	0	0	0	6	2	8
0	0	0	0	0	1	0	2	0	0	1	0	1	0	0	1	0	1	0	1	0	4	2	10
1	1	2	0	0	1	0	0	1	1	1	1	1	1	0	0	2	3	2	1	2	16	10	16
1	0	0	0	1	0	0	0	0	0	1	0	1	0	0	0	0	0	0	1	0	4	2	4
0	0	0	0	1	0	0	0	1	0	0	0	1	1	0	0	1	0	0	0	0	6	2	2
0	0	0	0	1	0	0	1	1	1	0	0	1	0	0	0	0	0	0	0	0	6	2	2
0	0	0	0	0	0	0	0	0	0	0	0	1	0	0	1	1	0	0	0	0	6	0	0
1	0	1	0	1	2	0	0	0	0	0	0	0	0	0	1	0	1	0	0	0	6	0	8
0	0	3	0	0	0	0	0	0	0	0	0	0	0	0	0	0	0	0	0	0	6	0	0
3	2	0	0	1	1	1	1	0	0	1	0	0	1	0	0	1	1	1	1	1	6	10	16
2	1	1	0	0	2	0	1	1	0	1	1	1	1	0	1	0	0	1	0	0	6	6	16
0	1	1	0	0	2	0	0	1	1	1	1	1	0	0	0	0	0	0	0	0	6	4	8
0	0	1	0	0	0	0	0	0	0	0	0	0	0	0	0	0	0	0	1	1	4	2	0
0	0	1	0	0	0	0	0	0	0	0	0	0	0	0	0	0	0	0	1	1	4	2	0
1	1	0	0	0	0	0	1	0	0	1	1	0	1	0	0	1	0	0	0	1	4	2	10
0	0	1	0	0	0	0	1	1	0	0	1	1	0	0	0	0	0	0	0	0	4	2	4
1	1	1	0	1	0	0	0	0	0	0	0	0	0	0	0	0	0	0	0	0	4	2	2
0	1	1	0	1	1	0	0	0	0	0	0	0	0	0	0	0	0	0	0	0	4	2	2
0	0	0	0	1	1	0	0	0	0	0	1	1	1	0	0	0	0	0	0	0	4	0	6
0	0	0	0	0	1	0	0	0	0	0	1	0	1	0	1	1	0	0	0	0	4	0	6
0	0	2	0	0	1	0	0	0	0	0	0	0	1	0	0	0	0	0	0	0	4	0	4
0	0	0	0	0	1	0	0	0	0	0	0	0	0	0	1	1	0	0	0	0	4	0	2
0	0	0	0	0	0	0	0	0	0	0	0	0	1	0	1	1	0	0	0	0	4	0	2
0	0	0	0	0	0	0	0	0	0	0	0	0	0	0	0	1	0	0	0	1	4	0	0
0	1	0	0	1	1	0	3	0	0	1	0	0	0	1	1	0	1	0	1	0	4	6	12
1	0	0	0	0	1	0	1	1	0	1	0	1	0	0	1	0	0	0	1	0	4	4	8
1	0	1	0	0	1	0	0	1	0	0	0	0	0	1	0	1	0	0	0	0	4	4	4
0	0	0	0	1	1	1	0	0	0	1	0	0	0	0	0	1	0	0	1	0	4	4	4
0	0	0	0	0	0	0	0	0	0	1	0	0	0	1	1	1	0	0	1	0	4	4	2
0	0	0	1	0	1	0	0	0	0	0	0	0	0	0	1	0	0	0	0	1	4	2	2
0	1	0	0	0	1	0	1	0	0	0	0	1	1	0	0	0	1	0	0	0	2	2	8
1	0	0	1	1	0	0	0	0	0	0	0	0	0	0	0	0	0	0	0	0	2	2	2
0	0	0	0	1	0	0	0	0	0	0	0	0	1	1	0	0	0	0	0	0	2	2	2
0	0	0	0	0	0	0	0	0	0	0	0	1	0	0	0	0	0	1	0	0	2	2	0
0	0	0	0	1	1	0	1	1	0	1	1	0	1	0	0	0	1	0	0	0	2	2	12
1	1	0	0	0	1	0	0	0	0	1	1	1	0	0	0	0	0	0	0	0	2	2	8
0	0	0	0	1	1	0	1	1	0	0	0	0	1	0	0	0	0	0	0	0	2	2	6
1	1	0	0	0	0	0	0	0	0	1	1	1	0	0	0	0	0	0	0	0	2	2	6
0	0	0	0	0	0	0	0	0	0	0	0	0	1	0	1	0	1	0	1	0	2	2	4
1	0	0	0	0	1	0	0	0	0	0	0	0	0	1	0	0	0	0	0	1	2	2	4
0	0	0	0	0	0	0	0	0	0	0	0	0	0	0	0	0	0	0	0	1	2	0	0
0	0	0	0	0	0	0	0	0	0	0	0	0	0	0	1	0	0	0	0	0	2	0	0
2	0	0	0	0	0	0	0	0	0	1	0	1	0	0	0	0	0	0	0	0	2	0	6
1	0	0	0	1	1	0	0	0	0	0	0	0	0	0	0	0	0	0	0	0	2	0	4
0	0	0	0	0	0	0	0	0	1	0	0	0	0	0	0	0	0	0	0	0	2	0	0
0	0	0	0	0	0	0	0	0	0	0	0	0	0	0	0	0	0	0	0	1	2	0	0
0	0	0	0	1	0	0	0	0	0	0	0	0	0	0	0	0	0	0	0	0	2	0	0
0	2	0	1	0	0	0	0	0	0	0	0	0	0	0	1	0	0	1	0	0	2	8	0
1	1	0	0	0	1	0	0	1	0	0	0	0	1	0	0	1	0	1	0	0	2	6	6
1	1	0	0	0	0	0	0	0	0	0	0	0	0	0	0	1	0	0	0	0	2	2	2
1	0	0	0	0	1	0	0	0	0	0	0	0	0	0	0	0	0	0	1	1	2	2	4
0	1	0	0	0	0	0	0	0	0	0	0	0	0	0	0	0	0	0	0	0	0	2	0
0	1	0	0	0	0	0	0	0	0	0	0	0	0	0	0	0	0	0	0	0	0	2	0
1	0	0	0	0	2	1	2	0	0	0	0	0	0	0	0	0	0	0	0	0	0	2	10
0	0	0	0	0	0	0	1	1	0	0	1	0	0	0	0	0	0	0	0	0	0	2	4
0	1	0	0	0	1	0	1	0	0	0	0	0	0	0	0	0	0	0	0	0	0	2	4
1	1	0	0	0	1	0	0	0	0	0	0	0	0	0	0	0	0	0	0	0	0	2	4
0	1	0	0	0	1	0	0	0	0	0	0	0	0	0	0	0	0	0	0	0	0	2	2
1	1	0	0	0	0	0	0	0	0	0	0	0	0	0	0	0	0	0	0	0	0	2	2
1	0	0	0	0	0	0	0	1	0	0	0	0	0	0	0	0	0	0	0	0	0	2	2
0	1	0	0	0	0	0	0	0	0	0	0	0	0	0	0	0	0	0	0	0	0	2	0
0	1	0	0	0	0	0	0	0	0	0	0	0	0	0	0	0	0	0	0	0	0	2	0
0	0	0	0	0	0	1	0	0	0	0	0	0	0	0	0	0	0	0	0	0	0	2	0
0	0	0	0	0	0	1	0	0	0	0	0	0	0	0	0	0	0	0	0	0	0	2	0
0	0	0	0	0	0	1	0	0	0	0	0	0	0	0	0	0	0	0	0	0	0	2	0
0	0	0	0	0	0	0	0	1	0	0	0	0	0	0	0	0	0	0	0	0	0	2	0
0	0	0	0	0	0	0	0	0	0	0	0	0	0	0	0	0	0	0	0	0	0	0	0
0	0	0	0	0	0	0	0	0	0	0	0	0	0	0	0	0	0	0	0	0	0	0	0
0	0	0	0	0	0	0	0	0	0	0	0	0	0	0	0	0	0	0	0	0	0	0	0
1	0	0	0	0	1	0	0	0	0	0	0	0	0	0	0	0	0	0	0	0	0	0	4
0	0	0	0	0	1	0	0	0	0	0	0	0	0	0	0	0	0	0	0	0	0	0	2
1	0	0	0	0	0	0	0	0	0	0	0	0	0	0	0	0	0	0	0	0	0	0	2
0	0	0	0	0	0	0	1	0	0	0	0	0	0	0	0	0	0	0	0	0	0	0	2
0	0	0	0	0	1	0	0	0	0	0	0	0	0	0	0	0	0	0	0	0	0	0	2
0	0	0	0	0	0	0	0	0	0	1	0	0	0	0	0	0	0	0	0	0	0	0	2
0	0	0	0	0	0	0	0	0	0	0	0	0	0	0	0	0	0	0	0	0	0	0	0
0	0	0	0	0	0	0	0	0	0	0	0	0	0	0	0	0	0	0	0	0	0	0	0
0	0	0	0	0	0	0	0	0	0	0	0	0	0	0	0	0	0	0	0	0	0	0	0
0	0	0	0	0	0	0	0	0	0	0	0	0	0	0	0	0	0	0	0	0	0	0	0
0	0	0	0	0	0	0	0	0	0	0	0	0	0	0	0	0	0	0	0	0	0	0	0
0	0	0	0	0	0	0	0	0	0	0	0	0	0	0	0	0	0	0	0	0	0	0	0
0	0	0	0	0	0	0	0	0	0	0	0	0	0	0	0	0	0	0	0	0	0	0	0
0	0	0	0	0	0	0	0	0	0	0	0	0	0	0	0	0	0	0	0	0	0	0	0
0	0	0	0	0	0	0	0	0	0	0	0	0	0	0	0	0	0	0	0	0	0	0	0
0	0	0	0	0	0	0	0	0	0	0	0	0	0	0	0	0	0	0	0	0	0	0	0
0	0	0	0	0	0	0	0	0	0	0	0	0	0	0	0	0	0	0	0	0	0	0	0
0	0	0	0	0	0	0	0	0	0	0	0	0	0	0	0	0	0	0	0	0	0	0	0
0	0	0	0	0	0	0	0	0	0	0	0	0	0	0	0	0	0	0	0	0	0	0	0
0	0	0	0	0	0	0	0	0	0	0	0	0	0	0	0	0	0	0	0	0	0	0	0
0	0	0	0	0	0	0	0	0	0	0	0	0	0	0	0	0	0	0	0	0	0	0	0
0	0	0	0	0	0	0	0	0	0	0	0	0	0	0	0	0	0	0	0	0	0	0	0
0	0	0	0	0	0	0	0	0	0	0	0	0	0	0	0	0	0	0	0	0	0	0	0
0	0	0	0	0	0	0	0	0	0	0	0	0	0	0	0	0	0	0	0	0	0	0	0
0	0	0	0	0	0	0	0	0	0	0	0	0	0	0	0	0	0	0	0	0	0	0	0
0	0	0	0	0	0	0	0	0	0	0	0	0	0	0	0	0	0	0	0	0	0	0	0
0	0	0	0	0	0	0	0	0	0	0	0	0	0	0	0	0	0	0	0	0	0	0	0
0	0	0	0	0	0	0	0	0	0	0	0	0	0	0	0	0	0	0	0	0	0	0	0
0	0	0	0	0	0	0	0	0	0	0	0	0	0	0	0	0	0	0	0	0	0	0	0
0	0	0	0	0	0	0	0	0	0	0	0	0	0	0	0	0	0	0	0	0	0	0	0
0	0	0	0	0	0	0	0	0	0	0	0	0	0	0	0	0	0	0	0	0	0	0	0
0	0	0	0	0	0	0	0	0	0	0	0	0	0	0	0	0	0	0	0	0	0	0	0
0	0	0	0	0	0	0	0	0	0	0	0	0	0	0	0	0	0	0	0	0	0	0	0
0	0	0	0	0	0	0	0	0	0	0	0	0	0	0	0	0	0	0	0	0	0	0	0
0	0	0	0	0	0	0	0	0	0	0	0	0	0	0	0	0	0	0	0	0	0	0	0
0	0	0	0	0	0	0	0	0	0	0	0	0	0	0	0	0	0	0	0	0	0	0	0

## Sheet: follow-up dass
1	2	3	4	5	6	7	8	9	10	11	12	13	14	15	16	17	18	19	20	21	Dep	Anxiety	Stress
3	2	2	1	2	2	2	2	2	1	2	2	2	2	2	2	2	2	2	2	2	26	26	30
1	0	1	0	1	2	1	1	1	1	1	2	1	1	0	0	0	0	1	0	1	10	6	16
3	3	0	0	1	1	1	1	0	0	1	0	0	1	0	0	0	1	1	1	1	4	12	16
2	0	1	1	1	1	0	2	2	1	1	1	1	1	1	0	1	0	1	0	0	10	10	16
1	1	0	0	1	0	0	1	2	1	1	1	1	1	0	1	1	1	0	0	0	10	6	12
1	0	1	0	0	1	1	1	1	0	1	2	1	0	1	1	0	0	1	0	0	6	8	12
0	0	0	0	0	1	0	2	0	0	1	1	1	0	1	1	0	1	0	1	0	4	4	12
0	0	0	0	1	1	0	3	0	0	1	1	1	0	0	1	0	0	3	0	0	6	6	12
1	1	1	0	0	2	0	0	1	0	1	1	1	0	0	0	0	0	0	1	0	4	6	10
2	1	1	0	2	0	1	1	1	1	1	0	2	0	0	0	1	1	0	0	1	16	6	10
1	1	0	1	0	0	0	0	0	2	1	2	2	1	0	0	0	0	0	0	0	8	4	10
0	0	3	0	1	3	0	0	0	0	1	0	1	1	0	0	0	0	0	0	0	10	0	10
1	1	0	0	0	1	0	0	0	0	1	1	1	1	0	0	0	0	0	0	0	2	2	10
1	2	0	0	0	1	0	1	0	0	0	0	1	1	0	0	0	1	0	0	0	2	4	10
0	0	2	0	2	1	0	1	1	2	1	1	1	0	1	1	1	1	0	1	0	18	6	10
1	3	3	3	0	0	0	0	1	1	1	1	1	1	1	1	1	1	1	1	1	16	20	10
1	0	1	0	1	2	0	0	0	0	0	1	0	0	0	1	0	1	0	0	0	6	0	10
0	0	2	0	2	1	0	0	2	0	1	2	0	1	1	0	0	0	0	1	0	8	8	10
2	0	1	0	0	0	0	0	0	1	1	1	0	0	1	0	1	1	0	1	1	8	4	10
1	0	0	0	0	1	0	1	0	1	2	0	2	0	0	0	0	0	0	1	1	8	2	10
1	1	1	1	1	1	0	0	0	1	0	1	1	1	0	1	1	0	1	0	1	14	6	8
1	0	0	0	0	1	0	0	0	0	0	1	0	1	0	1	1	0	0	0	0	4	0	8
1	0	0	0	1	1	0	1	1	0	0	0	0	1	0	0	0	0	0	0	0	2	2	8
1	1	0	0	0	1	0	0	0	0	1	1	1	0	0	0	0	0	0	0	0	2	2	8
0	1	1	0	0	1	1	0	1	1	1	1	1	1	1	0	1	0	0	1	1	10	10	8
1	1	0	0	0	1	0	0	1	0	0	0	0	2	0	0	0	0	2	0	0	0	8	8
1	1	1	0	1	1	0	1	1	1	0	0	1	1	0	0	1	0	0	0	0	10	4	8
1	1	0	0	0	0	0	0	1	1	1	1	1	1	1	1	1	0	0	0	0	8	6	8
1	1	1	0	1	0	0	0	1	2	1	0	2	0	1	0	3	2	2	0	1	20	10	8
0	0	0	0	1	1	0	0	1	0	1	1	1	0	0	1	0	1	1	0	0	6	4	8
3	3	3	0	2	3	3	2	3	0	2	2	2	2	3	3	3	3	3	3	1	28	36	34
0	0	1	3	0	1	1	2	3	3	2	3	3	3	3	3	3	3	3	3	3	32	32	28
2	1	1	0	1	0	0	2	2	0	2	3	3	1	0	2	1	2	0	0	1	18	6	24
2	2	1	0	3	2	1	1	2	2	1	1	1	1	1	2	1	1	2	1	0	20	18	18
1	0	1	0	2	1	0	1	1	2	1	1	2	2	0	1	2	2	1	1	2	24	6	18
2	2	0	1	1	1	2	1	0	0	1	1	1	1	0	1	0	1	2	1	0	6	16	16
1	1	2	0	0	1	0	0	1	1	1	1	1	1	0	0	3	3	3	1	2	18	12	16
0	0	1	2	3	2	2	0	2	1	3	0	3	2	1	3	2	1	0	1	3	32	16	16
1	1	2	0	1	2	0	1	3	2	2	1	2	1	1	0	1	0	1	1	1	18	14	16
2	1	0	0	0	1	0	1	1	1	1	1	1	1	0	1	1	1	1	1	1	10	8	16
1	0	0	0	0	1	0	1	2	2	2	1	2	0	2	0	2	2	2	0	0	12	12	16
2	0	0	0	0	1	1	1	1	1	1	1	1	1	1	1	1	1	1	1	1	10	10	16
1	0	1	0	1	1	1	1	2	1	1	1	1	2	1	2	2	1	1	0	1	18	10	16
1	1	1	1	1	2	0	1	1	1	1	1	0	1	1	1	0	1	1	0	0	8	10	16
3	3	1	0	0	1	0	1	1	1	1	1	1	0	0	1	1	0	1	0	2	14	10	14
2	0	1	0	2	1	0	1	1	0	1	1	1	1	1	1	0	0	1	0	0	10	6	14
0	1	0	0	1	1	2	3	0	0	1	1	0	0	1	0	0	1	0	1	0	2	10	14
1	0	1	0	2	1	0	0	1	1	2	1	1	1	0	1	1	1	0	1	1	16	4	14
2	0	0	2	1	2	0	1	1	1	1	0	0	0	0	0	1	1	1	1	1	8	10	14
2	0	0	2	1	2	0	0	1	1	1	0	0	0	0	0	1	1	1	1	1	8	10	12
1	0	0	0	0	3	1	2	0	0	0	0	0	0	0	0	0	0	0	0	0	0	2	12
2	1	0	0	0	0	0	1	0	0	1	1	1	1	1	2	0	0	0	1	0	6	6	12
1	1	0	0	0	0	0	1	0	0	1	1	0	2	0	0	1	0	0	0	1	4	2	12
1	0	1	0	1	0	0	1	0	2	1	1	1	1	1	1	0	1	0	1	1	14	4	12
0	1	1	0	0	0	0	1	0	0	1	1	1	1	0	1	1	1	0	0	0	8	2	10
1	0	0	0	0	1	0	1	1	0	1	1	1	0	1	0	0	0	0	1	0	2	6	10
1	0	2	1	1	1	0	1	0	0	1	1	0	0	0	0	0	0	1	0	0	6	4	10
1	2	1	0	1	1	0	0	0	0	1	0	1	2	0	1	0	0	2	0	0	8	8	10
2	0	0	0	2	3	0	0	0	0	0	0	0	0	0	0	3	0	0	0	0	10	0	10
0	1	1	0	0	0	0	0	0	0	3	1	1	1	0	1	1	0	1	1	1	10	6	10
1	1	0	0	0	0	0	1	1	1	0	1	1	1	1	1	0	1	0	1	0	6	8	10
2	1	1	0	1	1	0	0	0	1	1	1	1	0	1	1	1	0	0	1	0	12	6	10
0	0	0	3	1	1	1	1	1	0	1	1	1	1	1	0	0	0	1	1	0	4	16	10
0	0	0	0	1	1	0	0	0	0	2	1	1	1	0	0	0	0	0	0	0	4	0	10
2	0	0	0	0	0	0	0	0	0	1	1	1	0	0	0	0	0	0	0	0	2	0	8
2	0	1	0	1	1	0	0	1	0	0	1	1	0	0	0	0	0	0	0	0	6	2	8
1	1	0	0	0	1	0	0	1	1	1	1	2	0	0	1	2	0	1	1	3	18	8	8
0	0	2	0	0	1	0	0	1	1	1	2	3	0	0	0	1	0	0	3	1	16	8	8
1	0	1	0	1	1	0	0	0	1	1	1	0	0	0	1	0	0	0	0	0	8	0	8
2	2	2	1	2	2	2	2	2	1	2	2	2	2	2	2	2	2	2	2	2	26	26	28
2	0	1	0	0	2	0	1	2	2	2	2	2	2	1	2	2	1	0	2	2	22	10	24
3	1	2	0	2	1	1	1	2	1	1	2	2	2	1	2	3	1	0	1	3	30	12	22
1	0	1	0	2	2	0	1	1	2	2	2	1	1	1	2	3	1	1	2	2	26	10	20
0	0	1	0	0	3	0	2	0	0	0	1	2	1	3	1	3	3	1	3	1	16	14	20
1	1	0	1	2	2	0	2	2	2	1	1	2	1	0	0	1	1	1	0	1	16	10	18
3	2	1	1	2	1	1	2	0	0	1	1	1	1	1	2	1	0	1	2	1	16	16	18
2	1	1	0	0	2	0	2	1	0	1	1	0	1	0	1	0	0	2	0	0	4	8	18
2	1	2	0	3	1	0	2	0	0	1	1	1	1	0	2	0	1	1	1	1	18	6	18
3	2	1	1	1	2	1	0	0	0	2	1	0	0	1	1	0	1	0	2	2	10	14	18
1	0	0	0	1	0	0	1	0	1	1	3	3	3	3	2	0	0	0	1	1	16	8	18
1	0	1	0	3	1	0	2	2	2	2	2	2	1	1	3	2	0	0	2	3	32	10	18
1	0	0	0	1	2	0	2	2	1	1	1	1	1	1	0	0	0	0	2	1	8	10	16
1	0	1	0	1	1	0	1	0	1	1	1	1	2	0	1	1	1	0	0	1	14	0	16
2	1	1	0	2	1	0	1	1	1	1	1	2	1	1	0	1	1	1	1	1	16	10	16
2	1	0	2	2	1	1	1	1	0	2	1	1	0	0	0	2	1	2	0	1	12	14	16
0	0	0	0	1	1	0	1	1	0	2	1	0	2	0	0	0	1	0	0	0	2	2	16
1	0	0	1	1	1	0	1	0	1	1	1	1	1	0	1	0	1	2	0	1	10	6	14
0	1	1	0	0	3	0	1	2	1	0	2	2	1	2	1	2	0	0	0	0	14	10	14
2	1	1	0	0	1	0	1	0	1	0	0	1	1	0	1	0	1	0	0	0	8	2	12
2	0	1	0	0	3	1	1	1	0	2	2	2	0	2	0	1	2	2	2	3	14	16	24
2	2	1	1	2	1	0	1	1	0	1	1	1	2	0	0	0	2	0	1	0	8	10	20
2	0	1	0	2	2	1	2	1	1	1	2	2	0	1	1	0	0	1	0	0	14	8	18
1	1	1	1	1	1	1	1	1	1	1	1	1	1	1	1	1	2	0	1	1	14	12	16
1	0	1	1	1	1	1	2	1	0	1	1	1	1	1	1	1	1	1	1	1	12	12	16
2	1	2	0	2	2	3	2	2	1	3	2	3	2	1	1	0	0	0	0	0	18	14	26
2	3	0	0	1	0	0	3	2	1	1	1	2	2	0	0	1	1	0	0	1	12	10	20
3	2	2	3	3	2	2	2	1	1	2	2	1	1	2	2	1	1	3	2	0	20	30	26
3	1	3	0	1	3	0	0	1	1	1	3	3	2	3	3	3	1	0	0	0	28	10	26
2	2	1	0	0	2	1	1	1	1	2	2	2	1	1	0	3	3	2	1	1	16	16	26
3	1	1	2	3	2	1	1	1	2	3	1	3	2	1	1	3	1	2	3	3	32	22	26
2	0	3	1	3	3	1	1	3	3	1	0	3	3	2	1	3	3	0	0	3	38	14	26
3	0	0	0	0	0	0	2	0	0	0	2	3	3	0	3	3	3	0	0	3	24	0	26
1	3	3	0	3	3	3	2	3	3	3	2	3	3	3	3	3	3	3	3	3	42	36	34
2	1	1	1	1	3	1	1	1	1	3	2	2	1	1	1	1	1	0	1	0	14	12	26
1	1	1	2	2	1	2	3	1	2	1	2	2	2	3	1	2	2	2	3	2	24	28	24
1	2	3	3	3	3	3	2	3	2	3	2	3	3	2	3	3	3	1	1	3	40	30	34
3	2	1	0	1	2	1	1	2	3	3	2	3	3	2	2	2	1	1	1	3	30	18	30
3	2	2	2	2	2	2	2	3	2	2	2	3	2	2	2	2	2	2	2	2	30	30	30
0	0	0	1	1	0	0	2	1	1	1	1	0	0	0	0	0	0	1	0	0	4	6	8
1	3	2	0	0	1	0	0	0	0	0	1	1	1	0	0	1	0	0	0	0	8	6	8
0	0	0	0	0	1	0	0	0	0	0	1	0	1	1	1	3	1	0	1	3	14	4	8
0	1	0	0	0	0	0	1	0	0	0	0	0	0	3	3	3	3	3	3	3	18	20	8
0	0	1	0	1	1	0	1	1	0	1	0	0	1	0	0	1	0	0	0	2	10	2	8
0	0	0	0	0	0	0	1	1	0	0	1	0	1	0	0	0	0	0	0	0	0	2	6
0	1	0	0	0	0	0	0	1	1	1	1	1	1	0	0	0	0	0	1	0	4	6	6
1	1	1	0	0	1	0	0	1	0	1	0	0	0	1	0	0	0	0	0	0	2	6	6
0	0	0	0	3	1	0	0	1	0	0	1	1	0	1	1	1	1	1	1	0	12	8	6
1	0	1	0	1	1	0	0	1	0	0	0	1	1	1	1	0	0	0	0	0	8	4	6
1	3	3	0	0	1	1	0	0	0	0	0	0	0	1	0	0	1	0	0	0	6	10	6
1	0	0	0	1	1	0	0	0	0	0	1	0	0	0	0	0	0	0	0	0	2	0	6
0	0	0	0	0	0	0	0	0	0	1	0	0	1	0	1	0	1	0	1	0	2	2	6
0	0	0	0	0	0	0	0	1	1	1	1	1	0	1	1	1	1	1	1	1	10	8	6
2	1	0	0	0	1	0	0	0	0	0	0	0	0	0	0	0	0	0	1	0	0	4	6
1	1	0	0	0	1	0	1	0	0	0	0	0	0	0	0	0	0	0	0	0	0	2	6
0	2	1	0	1	0	0	0	1	0	1	0	1	1	1	1	0	1	1	2	0	8	14	6
1	0	0	0	0	1	0	1	0	0	0	0	0	0	1	0	0	0	0	0	1	2	2	6
0	0	0	0	1	1	1	1	1	0	1	0	0	0	0	0	0	0	0	1	0	2	6	6
1	0	1	0	0	0	0	1	1	0	0	1	1	0	0	0	0	0	0	0	0	4	2	6
1	1	1	0	1	0	0	1	1	1	0	1	0	0	1	1	0	0	1	0	0	8	8	6
0	0	1	0	2	1	0	0	0	1	0	1	0	1	0	0	2	0	0	0	0	12	0	6
3	0	0	0	0	0	0	0	0	0	0	0	0	0	0	0	0	0	0	0	0	0	0	6
0	0	2	0	0	1	0	0	0	0	1	0	0	1	0	0	0	0	0	0	0	4	0	6
1	0	0	0	0	0	0	0	0	0	0	1	1	1	0	1	1	0	1	0	3	12	2	6
1	1	0	0	0	1	0	0	0	0	0	0	0	1	0	0	0	0	0	0	0	0	2	6
1	0	0	0	1	0	0	0	0	0	1	1	1	0	0	0	0	0	0	1	0	4	2	6
1	1	1	0	1	1	0	0	0	0	1	0	0	0	0	0	0	0	0	0	0	4	2	6
0	0	0	0	0	1	1	1	0	0	1	0	0	0	1	1	0	0	0	1	0	2	6	6
0	0	1	0	0	1	0	1	0	2	0	1	1	0	0	0	2	0	0	2	2	16	4	6
1	0	0	0	0	1	0	0	0	0	0	0	0	0	0	0	0	0	0	0	0	0	0	4
0	1	0	0	0	1	0	0	0	0	0	0	0	0	0	0	0	1	0	0	0	0	2	4
1	1	0	1	1	1	0	0	0	0	0	0	0	0	0	0	0	0	0	0	0	2	4	4
1	1	2	0	0	0	0	0	2	1	1	0	0	0	1	0	0	0	0	1	0	6	10	4
1	0	0	0	1	0	0	0	1	0	0	0	1	1	0	0	1	0	0	0	0	6	2	4
1	1	1	0	1	1	0	0	0	0	0	0	0	0	0	0	0	0	0	0	0	4	2	4
2	1	0	0	0	0	0	0	0	0	0	0	0	0	0	0	0	0	0	0	0	0	2	4
1	0	0	0	0	1	0	0	0	0	0	0	0	0	0	1	1	0	0	0	0	4	0	4
1	2	0	0	0	0	0	0	1	0	1	0	0	0	0	0	0	0	0	0	0	0	6	4
1	0	0	0	1	0	0	0	1	0	0	0	0	1	1	0	0	0	0	0	0	2	4	4
0	0	1	0	0	0	0	2	0	0	0	0	1	0	0	2	1	0	0	0	0	10	0	4
1	0	0	0	0	1	0	0	1	0	0	0	0	0	0	0	0	0	0	0	0	0	2	4
2	0	0	0	0	0	0	0	0	0	0	0	0	0	0	0	0	0	0	0	0	0	0	4
0	0	0	0	0	0	0	1	0	0	1	0	0	0	0	0	0	0	0	0	0	0	0	4
0	0	0	0	1	0	0	1	0	0	0	1	0	0	0	1	1	0	1	0	1	8	2	4
0	1	0	1	0	1	0	1	1	0	0	0	0	0	0	0	0	0	0	0	1	2	6	4
0	0	0	0	1	1	0	1	1	1	0	0	1	0	0	0	0	0	0	0	0	6	2	4
0	0	0	0	0	1	0	1	0	0	0	0	0	0	0	0	0	0	0	0	0	0	0	4
0	0	0	0	0	0	0	1	0	0	0	0	0	1	0	1	1	0	0	0	0	4	0	4
0	0	0	0	0	0	0	1	0	0	1	0	0	0	0	0	0	0	0	0	0	0	0	4
0	0	0	0	0	1	0	0	0	0	0	0	0	0	0	0	0	0	0	0	0	0	0	2
1	3	3	0	1	0	0	0	1	1	0	0	0	0	0	0	0	0	1	0	0	10	10	2
0	0	0	0	0	0	0	0	0	1	0	0	0	1	0	0	0	0	0	0	0	2	0	2
0	1	0	0	0	1	0	0	0	0	0	0	0	0	0	0	0	0	0	0	0	0	2	2
0	1	0	0	0	1	0	0	0	0	0	0	0	0	0	0	0	0	0	0	0	0	2	2
0	0	0	0	0	1	0	0	0	0	0	0	0	0	0	0	0	0	0	0	0	0	0	2
1	0	0	0	0	0	0	0	0	0	0	0	0	0	0	0	0	0	0	0	0	0	0	2
0	0	0	0	0	1	1	0	0	0	0	0	0	0	0	0	0	0	0	0	0	0	2	2
0	0	0	0	0	1	1	0	0	0	0	0	0	0	0	0	0	0	0	0	0	0	2	2
0	0	0	0	0	1	1	0	0	0	0	0	0	0	0	0	0	0	0	0	0	0	2	2
0	0	0	0	0	1	0	0	0	0	0	0	1	0	1	0	1	0	0	0	1	6	2	2
1	0	0	0	0	0	0	0	0	0	0	0	0	0	0	0	0	0	0	0	0	0	0	2
0	0	0	0	0	1	0	0	1	0	0	0	0	0	0	0	0	0	0	0	0	0	2	2
1	0	0	0	0	0	0	0	0	0	0	0	1	0	0	0	0	0	2	0	0	2	4	2
1	0	0	0	0	0	0	0	0	0	0	0	0	0	0	0	0	0	0	0	0	0	0	2
1	2	0	0	0	0	0	0	0	0	0	0	0	0	0	0	0	0	0	0	0	0	4	2
0	0	1	0	0	0	0	0	1	0	1	0	0	0	0	0	0	0	0	1	1	4	4	2
0	0	1	0	0	0	0	0	1	0	0	0	0	1	0	0	0	0	0	1	1	4	4	2
0	0	0	0	1	0	1	0	0	1	0	0	1	1	0	0	0	0	0	0	0	6	2	2
0	0	0	0	0	0	0	0	0	0	0	0	1	0	0	1	1	1	0	0	1	8	0	2
0	0	0	0	0	0	0	0	0	0	0	0	0	0	0	0	0	1	0	0	1	2	0	2
0	0	0	0	0	0	0	1	0	0	0	0	0	0	0	0	0	0	0	1	1	2	2	2
0	0	0	0	0	0	0	1	0	0	0	0	0	0	1	1	0	0	0	0	0	2	2	2
0	0	0	0	0	0	0	1	0	0	0	0	0	0	0	0	0	0	0	0	0	0	0	2
0	0	0	0	0	0	0	1	0	0	0	0	0	0	0	0	0	0	0	0	0	0	0	2
0	0	0	0	0	0	0	1	0	0	0	0	0	0	0	0	0	0	0	0	0	0	0	2
0	0	0	0	0	0	0	1	0	0	0	0	0	0	0	0	0	0	0	0	0	0	0	2
0	0	0	0	0	0	0	0	0	0	0	0	0	0	0	0	0	0	0	0	0	0	0	0
0	0	0	1	1	0	1	0	0	0	0	0	0	0	0	2	0	0	0	0	0	6	4	0
0	0	0	0	0	0	0	0	0	0	0	0	0	0	3	0	3	0	0	0	0	6	6	0
0	0	0	0	0	0	0	0	0	0	0	0	0	0	0	0	0	0	0	0	0	0	0	0
0	0	0	0	0	0	0	0	0	0	0	0	0	0	0	0	0	0	0	0	0	0	0	0
0	0	0	0	0	0	0	0	0	0	0	0	0	0	0	0	0	0	0	0	0	0	0	0
0	0	0	0	0	0	0	0	0	0	0	0	0	0	0	0	1	0	0	0	1	4	0	0
0	0	0	0	0	0	0	0	0	0	0	0	0	0	0	0	0	0	0	0	0	0	0	0
0	1	0	0	0	0	0	0	1	0	0	0	0	0	0	0	0	0	0	0	0	0	4	0
0	0	0	0	0	0	0	0	0	0	0	0	0	0	0	0	0	0	0	0	0	0	0	0
0	3	0	0	0	0	0	0	0	0	0	0	0	0	0	0	0	0	3	0	0	0	12	0
0	0	0	0	0	0	0	0	0	0	0	0	0	0	0	0	0	0	0	0	0	0	0	0
0	0	0	0	0	0	0	0	0	0	0	0	0	0	0	0	0	0	0	0	0	0	0	0
0	0	0	0	0	0	0	0	0	0	0	0	0	0	0	0	0	0	0	0	0	0	0	0
0	0	0	0	0	0	0	0	0	0	0	0	0	0	0	0	0	0	0	0	0	0	0	0
0	0	0	0	0	0	0	0	0	0	0	0	0	0	0	0	0	0	0	0	0	0	0	0
0	0	0	0	0	0	0	0	0	0	0	0	0	0	0	0	0	0	0	0	0	0	0	0
0	1	0	0	0	0	0	0	0	0	0	0	0	0	0	0	0	0	0	0	0	0	2	0
0	1	0	0	0	0	0	0	0	0	0	0	1	0	0	1	1	0	0	0	0	6	2	0
0	0	0	0	0	0	0	0	0	0	0	0	0	0	0	0	0	0	0	0	0	0	0	0
0	0	3	0	0	0	0	0	0	0	0	0	0	0	0	0	0	0	0	0	0	6	0	0
0	0	0	0	1	0	0	0	0	0	0	0	0	0	0	0	0	0	0	0	0	2	0	0
0	0	0	0	0	0	0	0	0	0	0	0	0	0	0	0	0	0	0	0	0	0	0	0
0	0	0	0	0	0	0	0	0	0	0	0	0	0	0	0	0	0	0	0	0	0	0	0
0	0	0	0	0	0	0	0	0	0	0	0	0	0	0	0	0	0	0	0	0	0	0	0
0	0	0	0	0	0	0	0	0	0	0	0	0	0	0	0	0	0	0	0	0	0	0	0
0	0	0	0	0	0	0	0	1	0	0	0	0	0	0	0	0	0	0	0	0	0	2	0
0	1	0	0	0	0	0	0	0	0	0	0	0	0	0	0	0	0	0	0	0	0	2	0
0	0	0	0	0	0	0	0	0	0	0	0	0	0	0	0	0	0	0	0	0	0	0	0
0	0	0	0	0	0	0	0	0	0	0	0	0	0	0	0	0	0	0	0	0	0	0	0
0	0	0	0	0	0	0	0	0	0	0	0	0	0	0	0	0	0	0	0	0	0	0	0
0	0	0	0	0	0	0	0	0	0	0	0	0	0	0	0	0	0	0	0	0	0	0	0
